# Supplementary material for: Long Exposure to Salt Stress Leads to Stronger Damage in Chloroplast Ultrastructure and its Functionality than the Stomatal Function in<em> Jatropha curcas</em>
Source: Preprints.org preprint supplement (doi:10.20944/preprints202307.0048.v1), 2023-07-04
Supplement: Supplementary file 1 [file supplementary]

## Sheet: Planilha1
Salt exposure
Salt concentration		0.0252
Abaxial epidemis surface thickness		0.401	-0.162
Adaxial epidemis surface thickness		0.448	-0.103	0.592
Palisade parenchyma		0.29	0.0263	0.432	0.373
Spongy parenchyma		0.374	-0.0207	0.389	0.636	0.311
Total thickness		0.487	-0.0309	0.625	0.0963	0.726	0.845
Palissade to spongy parenchyma		-0.0323	0.00599	0.0639	-0.0771	0.402	-0.415	-0.0682
Layers of palisades		-0.00399	0.0063	-0.0629	-0.0771	0.0339	-0.0594	-0.0411	0.0655
Cristals area		0.6	-0.726	0.0887	0.0804	0.137	0.0631	-0.123	0.119	0.00617
Air spaces in spongy parenchyma (%)		0.0063	0.112	-0.00502	0.146	0.184	0.107	-0.137	0.00442	0.0552	-0.011
Lumen vessel area		0.174	-0.546	0.077	-0.0829	-0.0767	-0.165	-0.121	0.155	-0.0054	0.0754	-0.048
Xylem area		-0.403	-0.479	0.122	0.0225	-0.0138	-0.0713	-0.0275	0.115	0.136	0.202	-0.0293	0.564																								1	1
Vesel element density		0.196	0.48	0.0691	0.112	0.359	0.207	0.292	0.0363	0.192	0.0537	0.167	-0.257	0.0414																							0.75
Total xylem area		-0.339	-0.724	-0.251	-0.319	-0.244	-0.217	-0.331	-0.069	-0.473	-0.146	0.0552	0.0137	-0.112	-0.216																						0.5
Thickness of xylem		-0.484	-0.547	-0.13	-0.227	-0.193	-0.168	-0.234	-0.0351	-0.149	-0.112	-0.0763	0.172	-0.0793	-0.377	0.618																					0.25
Midrib Thickness		-0.44	-0.754	-0.241	-0.34	-0.305	-0.298	-0.377	0.00091	-0.0696	-0.077	-0.0532	0.318	0.249	-0.436	0.633	0.655																				0.0938	0
Midrib Length		-0.48	-0.726	-0.21	-0.323	-0.312	-0.292	-0.369	-0.0166	-0.106	-0.0843	-0.087	0.297	0.192	-0.421	0.67	0.688	0.964																			-0.25
Midrib area		-0.346	-0.634	-0.207	-0.293	-0.24	-0.265	-0.325	0.0147	-0.045	-0.0383	-0.0252	0.328	0.305	-0.193	0.623	0.612	0.892	0.891																		-0.5
Potential conductivity		0.164	0.0183	0.125	0.0198	0.211	-0.000469	0.11	0.174	0.124	0.19	0.0949	0.46	0.486	0.64	-0.201	-0.204	-0.14	-0.149	0.116																	-0.75
Stomatal density (Abaxial)		0.0635	0.303	0.0633	-0.0893	-0.234	-0.107	-0.186	-0.113	0.0164	0.00358	-0.0898	-0.134	-0.114	-0.11	-0.146	-0.272	-0.175	0.16	-0.17	-0.179																-1	-1
Ordinary cells density (Abaxial)		0.234	0.27	0.0178	0.105	-0.065	-0.184	-0.146	0.0763	0.0523	0.0934	-0.0506	-0.0512	0.0572	0.0239	-0.263	-0.296	-0.218	-0.239	-0.158	0.0464	0.512
Stomatal index (Abaxial)		-0.115	0.062	-0.0337	-0.147	-0.157	0.135	0.016	-0.205	-0.02	-0.0429	-0.0718	-0.0906	-0.149	-0.123	0.0766	-0.0156	0.00154	0.038	-0.0518	-0.221	0.753	-0.383
Stomatal density (Adaxial)		0.148	0.319	-0.16	-0.135	-0.235	-0.262	-0.305	0.0157	0.0475	0.0572	0.0573	-0.044	0.0193	0.00963	-0.227	-0.228	-0.175	-0.195	-0.114	0.0762	0.391	0.572	-0.149
Ordinary cells density (Adaxial)		0.0453	0.145	-0.0286	-0.0725	-0.127	-0.244	-0.232	0.105	-0.147	0.0758	0.00783	-0.0225	0.178	0.0151	-0.177	-0.105	-0.126	-0.185	-0.0429	0.138	0.297	0.479	-0.143	0.642
Stomatal index (Adaxial)		0.0712	0.139	-0.224	-0.185	-0.288	-0.227	-0.306	-0.0487	0.0405	0.000208	-0.0552	0.0202	-0.0587	-0.0919	-0.12	0.163	-0.0352	0.000537	-0.0551	-0.0409	0.243	0.337	-0.0932	0.646	-0.0255
Ordinary cell area (Abaxial)		0.0712	-0.091	0.0151	0.0239	0.0547	0.142	0.116	-0.0543	-0.00952	0.0268	-0.0417	0.0237	-0.0492	0.0573	-0.0593	0.113	-0.0569	-0.0246	-0.0614	0.0283	-0.23	-0.204	-0.0381	-0.173	-0.0837	-0.18
Stomatal complex area (Abaxial)		-0.125	-0.0686	-0.0158	-0.00917	0.0227	0.102	0.0731	-0.0833	-0.0392	-0.0664	0.0221	-0.0848	-0.118	0.0423	0.156	0.226	0.088	0.0998	0.0537	-0.0725	-0.347	-0.317	-0.0363	-0.262	-0.211	-0.189	0.155
Stomatal area (Abaxial)		-0.223	-0.3149	-0.0375	-0.072	0.00297	0.0879	0.046	-0.0896	-0.0539	-0.0521	0.0378	-0.0464	-0.132	0.0896	0.172	0.336	0.175	0.172	0.155	-0.0157	-0.704	-0.726	-0.0329	-0.431	-0.308	-0.32	0.279	0.515
Stomatal pore area (Abaxial)		-0.436	-0.6149	-0.0713	-0.0899	-0.00195	0.00419	-0.0206	-0.0394	-0.0591	-0.0436	0.154	-0.0779	-0.112	0.083	0.185	0.255	0.13	0.14	0.142	-0.0257	-0.339	-0.338	-0.0327	-0.254	-0.164	-0.251	0.24	0.356	0.496
Ordinary cell area (Adaxial)		0.201	-0.161	0.105	0.0692	0.0933	0.236	0.219	-0.109	-0.0201	-0.00452	0.0337	0.0844	0.0102	0.127	-0.0478	0.181	0.0502	0.0264	0.0805	0.152	-0.248	-0.125	-0.152	-0.182	-0.0556	-0.182	0.277	0.206	0.361	0.177
Stomatal complex area (Adaxial)		0.0121	0.17	0.00229	0.0375	0.104	0.0589	0.0806	-0.0203	0.0987	-0.0363	0.173	-0.0828	-0.0216	0.34	-0.114	-0.0744	-0.139	-0.183	-0.11	0.162	-0.391	-0.191	-0.202	-0.187	-0.0827	-0.248	0.227	0.231	0.428	0.276	0.285
Stomatal area (Adaxial)		-0.15	-0.132	-0.0359	-0.0255	0.0844	0.0698	0.0638	-0.0331	0.0797	-0.121	0.125	-0.0587	-0.141	0.353	0.0134	0.0815	-0.0237	-0.048	0.0452	0.623	-0.456	-0.252	-0.224	-0.263	-0.169	-0.244	0.223	0.239	0.516	0.301	0.387	0.587
Stomatal pore area (Adaxial)		0.0198	-0.189	0.0514	0.0788	0.0977	0.15	0.16	-0.0535	-0.0133	-0.0264	0.0844	-0.217	-0.152	0.167	-0.04	-0.167	-0.143	-0.132	-0.125	0.3885	0.0406	-0.0382	0.0792	-0.116	-0.162	-0.0532	0.00828	0.0666	0.0259	0.107	-0.0785	0.0604	0.0128
Chloroplast area		-0.0427	-0.762	-0.163	-0.302	-0.176	-0.13	-0.191	-0.124	-0.0138	0.0102	-0.2	0.25	0.328	-0.312	0.482	0.391	0.629	0.641	0.519	0.791	-0.12	-0.399	0.22	-0.539	-0.372	-0.186	-0.0567	0.102	0.122	-0.0172	0.0835	-0.272	-0.209	-0.132
Cell area occupied by chloroplasts (%)		-0.335	-0.169	0.18	0.0615	-0.0304	-0.0332	-0.0313	-0.0378	-0.124	-0.106	0.112	0.178	0.142	-0.271	0.244	0.424	0.272	0.221	0.106	-0.119	-0.0627	-0.303	0.186	-0.17	-0.163	-0.118	-0.084	0.14	0.0524	0.0217	0.057	-0.0817	-0.0739	-0.157	0.0664
Grana thickness		-0.313	-0.799	0.171	0.153	0.01	-0.0516	-0.00411	0.0637	-0.0898	-0.0541	0.177	-0.0288	-0.0536	-0.0739	-0.0258	0.142	-0.0772	-0.133	-0.151	-0.0592	0.095	0.0763	0.064	0.341	0.202	0.0898	-0.112	-0.00406	-0.113	-0.0143	-0.0997	0.0143	-0.0547	-0.0829	-0.494	0.737
Grana width		-0.0294	-0.177	-0.136	0.073	0.0497	0.06	0.0364	0.0373	-0.0305	0.0621	-0.0311	0.0976	0.115	0.0974	0.155	0.0711	-0.0801	0.0948	0.098	0.0135	-0.292	-0.0172	-0.22	-0.077	-0.0288	0.00334	0.134	0.0997	0.137	0.0853	0.0502	0.0915	0.12	-0.0434	0.148	-0.0199	-0.269
Thickness to width grana ratio		-0.226	0.269	0.178	0.101	-0.00588	-0.0702	-0.0209	0.0373	-0.0681	-0.065	0.0755	-0.0588	-0.0916	-0.125	-0.107	0.0958	-0.0876	-0.134	-0.162	-0.134	0.133	0.0979	0.0838	0.354	0.236	0.115	-0.0782	-0.028	0.116	-0.0266	-0.102	-0.00757	-0.0744	-0.0442	-0.425	0.596	0.835	-0.497
Grana area		-0.0352	-0.098	0.0636	0.0776	0.11	0.17	0.143	-0.0528	0.0133	-0.0219	0.0556	-0.0146	0.0329	0.112	0.101	0.0143	-0.0531	0.0609	0.034	0.0122	-0.264	-0.271	-0.109	-0.241	-0.216	-0.147	0.0594	0.101	0.264	0.176	0.116	0.161	0.172	0.122	0.145	-0.104	-0.194	0.478	-0.256
Stacking grana (%)		-0.481	-0.753	-0.201	-0.201	-0.0607	0.0312	-0.0459	-0.112	0.0831	-0.081	-0.248	0.163	0.195	-0.244	0.261	0.097	0.327	0.381	0.308	-0.418	-0.141	-0.272	0.0733	-0.521	-0.368	-0.139	0.0873	0.0848	0.126	-0.012	0.0938	-0.167	-0.101	-0.0165	0.765	-0.453	0.864	0.312	-0.744	0.234
Lamelae per grana		-0.395	-0.218	0.216	0.199	0.0215	-0.0343	0.00892	0.0436	-0.0806	-0.11	0.157	0.000577	-0.0359	-0.164	0.0304	0.187	-0.0229	-0.0755	-0.156	-0.558	0.0593	-0.0399	0.109	0.176	0.0881	0.0479	-0.12	0.0188	-0.0805	-0.00632	-0.0941	-0.00853	-0.0423	-0.0936	-0.382	0.808	0.925	-0.211	0.757	-0.102	0.776
Starch granule (%)		0.522	0.653	-0.145	0.0699	-0.0581	0.00782	-0.024	-0.0629	0.0602	0.0389	0.0352	-0.384	-0.335	-0.216	-0.355	-0.62	-0.507	-0.475	-0.402	-0.718	0.441	0.547	0.0845	0.472	0.364	0.255	-0.184	-0.391	-0.456	-0.201	-0.437	0.0023	-0.132	0.263	-0.454	-0.558	-0.149	0.0414	-0.13	-0.0696	-0.748	-0.198
Plastoglobulus		0.273	0.486	0.153	0.153	-0.0181	-0.105	-0.043	0.0916	-0.0759	-0.0439	0.188	-0.106	-0.155	-0.0387	-0.165	-0.0255	-0.234	-0.287	-0.268	-0.0743	0.209	0.26	0.0402	0.526	0.336	0.191	-0.171	-0.121	-0.236	-0.0861	-0.184	0.0227	-0.0629	-0.0158	-0.671	0.57	-0.936	-0.323	0.797	-0.258	-0.949	-0.866	0.812
		Salt exposure	Salt concentration	Abaxial epidemis surface thickness	Adaxial epidemis surface thickness	Palisade parenchyma	Spongy parenchyma	Total thickness	Palissade to spongy parenchyma	Layers of palisades	Cristals area	Air spaces in spongy parenchyma (%)	Lume vessel area	Xylem area	Vesel element density	Total xylem area	Thickness of xylem	Midrib Thickness	Midrib Length	Midrib area	Potential conductivity	Stomatal density (Abaxial)	Ordinary cells density (Abaxial)	Stomatal index (Abaxial)	Stomatal density (Adaxial)	Ordinary cells density (Adaxial)	Stomatal index (Adaxial)	Ordinary cell area (Abaxial)	Stomatal complex area (Abaxial)	Stomatal area (Abaxial)	Stomatal pore area (Abaxial)	Ordinary cell area (Adaxial)	Stomatal complex area (Adaxial)	Stomatal area (Adaxial)	Stomatal pore area (Adaxial)	Chloroplast area	Cell area occupied by chloroplasts (%)	Grana thickness	Grana width	Thickness to width grana ratio	Grana area	Stacking grana (%)	Lamelae per grana	Starch granule (%)	Plastoglobulus
